# Supplementary material for: Tim-3-Expressing CD4+ and CD8+ T Cells in Human Tuberculosis (TB) Exhibit Polarized Effector Memory Phenotypes and Stronger Anti-TB Effector Functions
Source: PubMed Central journal article supplement (PMC3493466; doi:10.1371/journal.ppat.1002984), 2012-11-08

**Figure S4**

**A**

**Active TB**

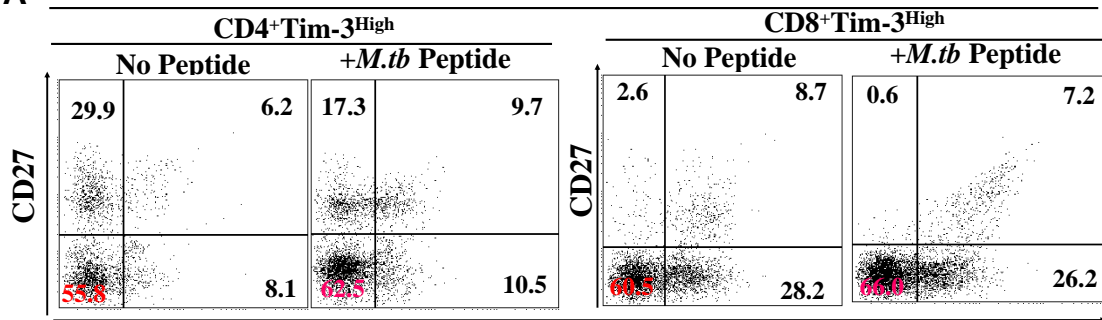

**B**

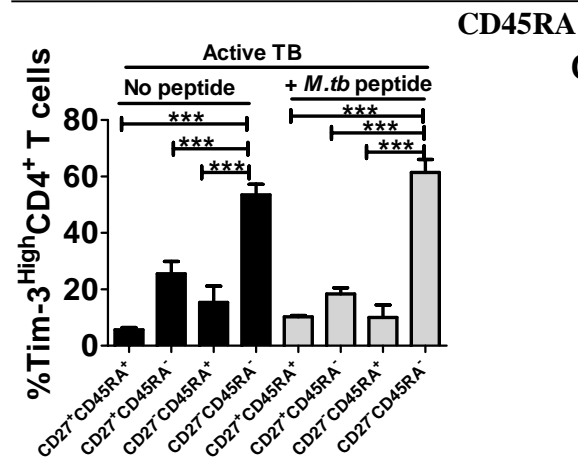

**C**

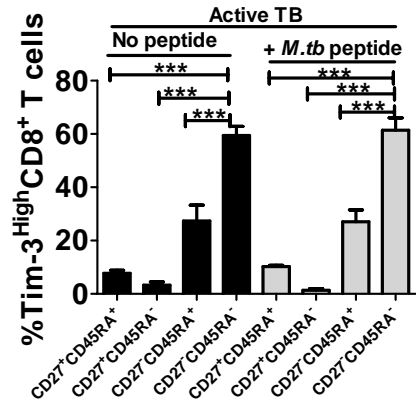

**D**

**LTBI**

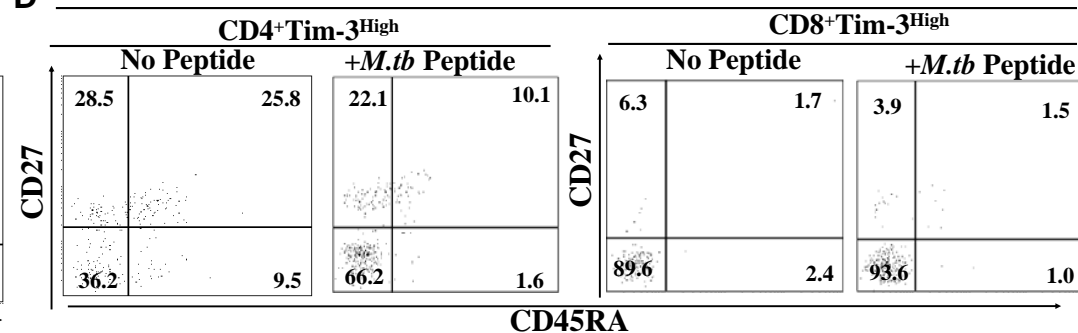

**E**

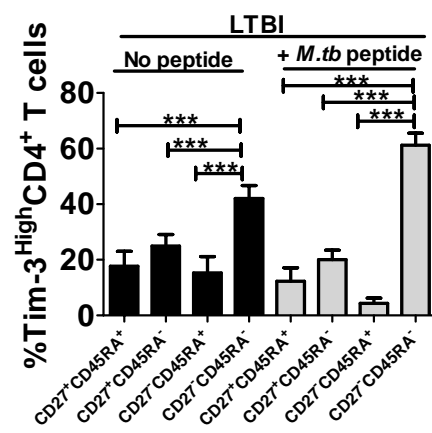

**F**

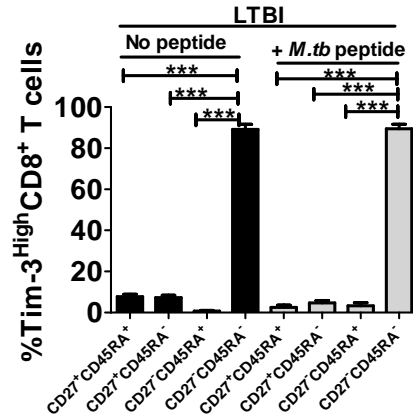

Supplement: ppat.1002984.s004.pdf [file ppat.1002984.s004.pdf]
