# Supplementary material for: Tim-3-Expressing CD4+ and CD8+ T Cells in Human Tuberculosis (TB) Exhibit Polarized Effector Memory Phenotypes and Stronger Anti-TB Effector Functions
Source: PubMed Central journal article supplement (PMC3493466; doi:10.1371/journal.ppat.1002984), 2012-11-08

**Figure S6**

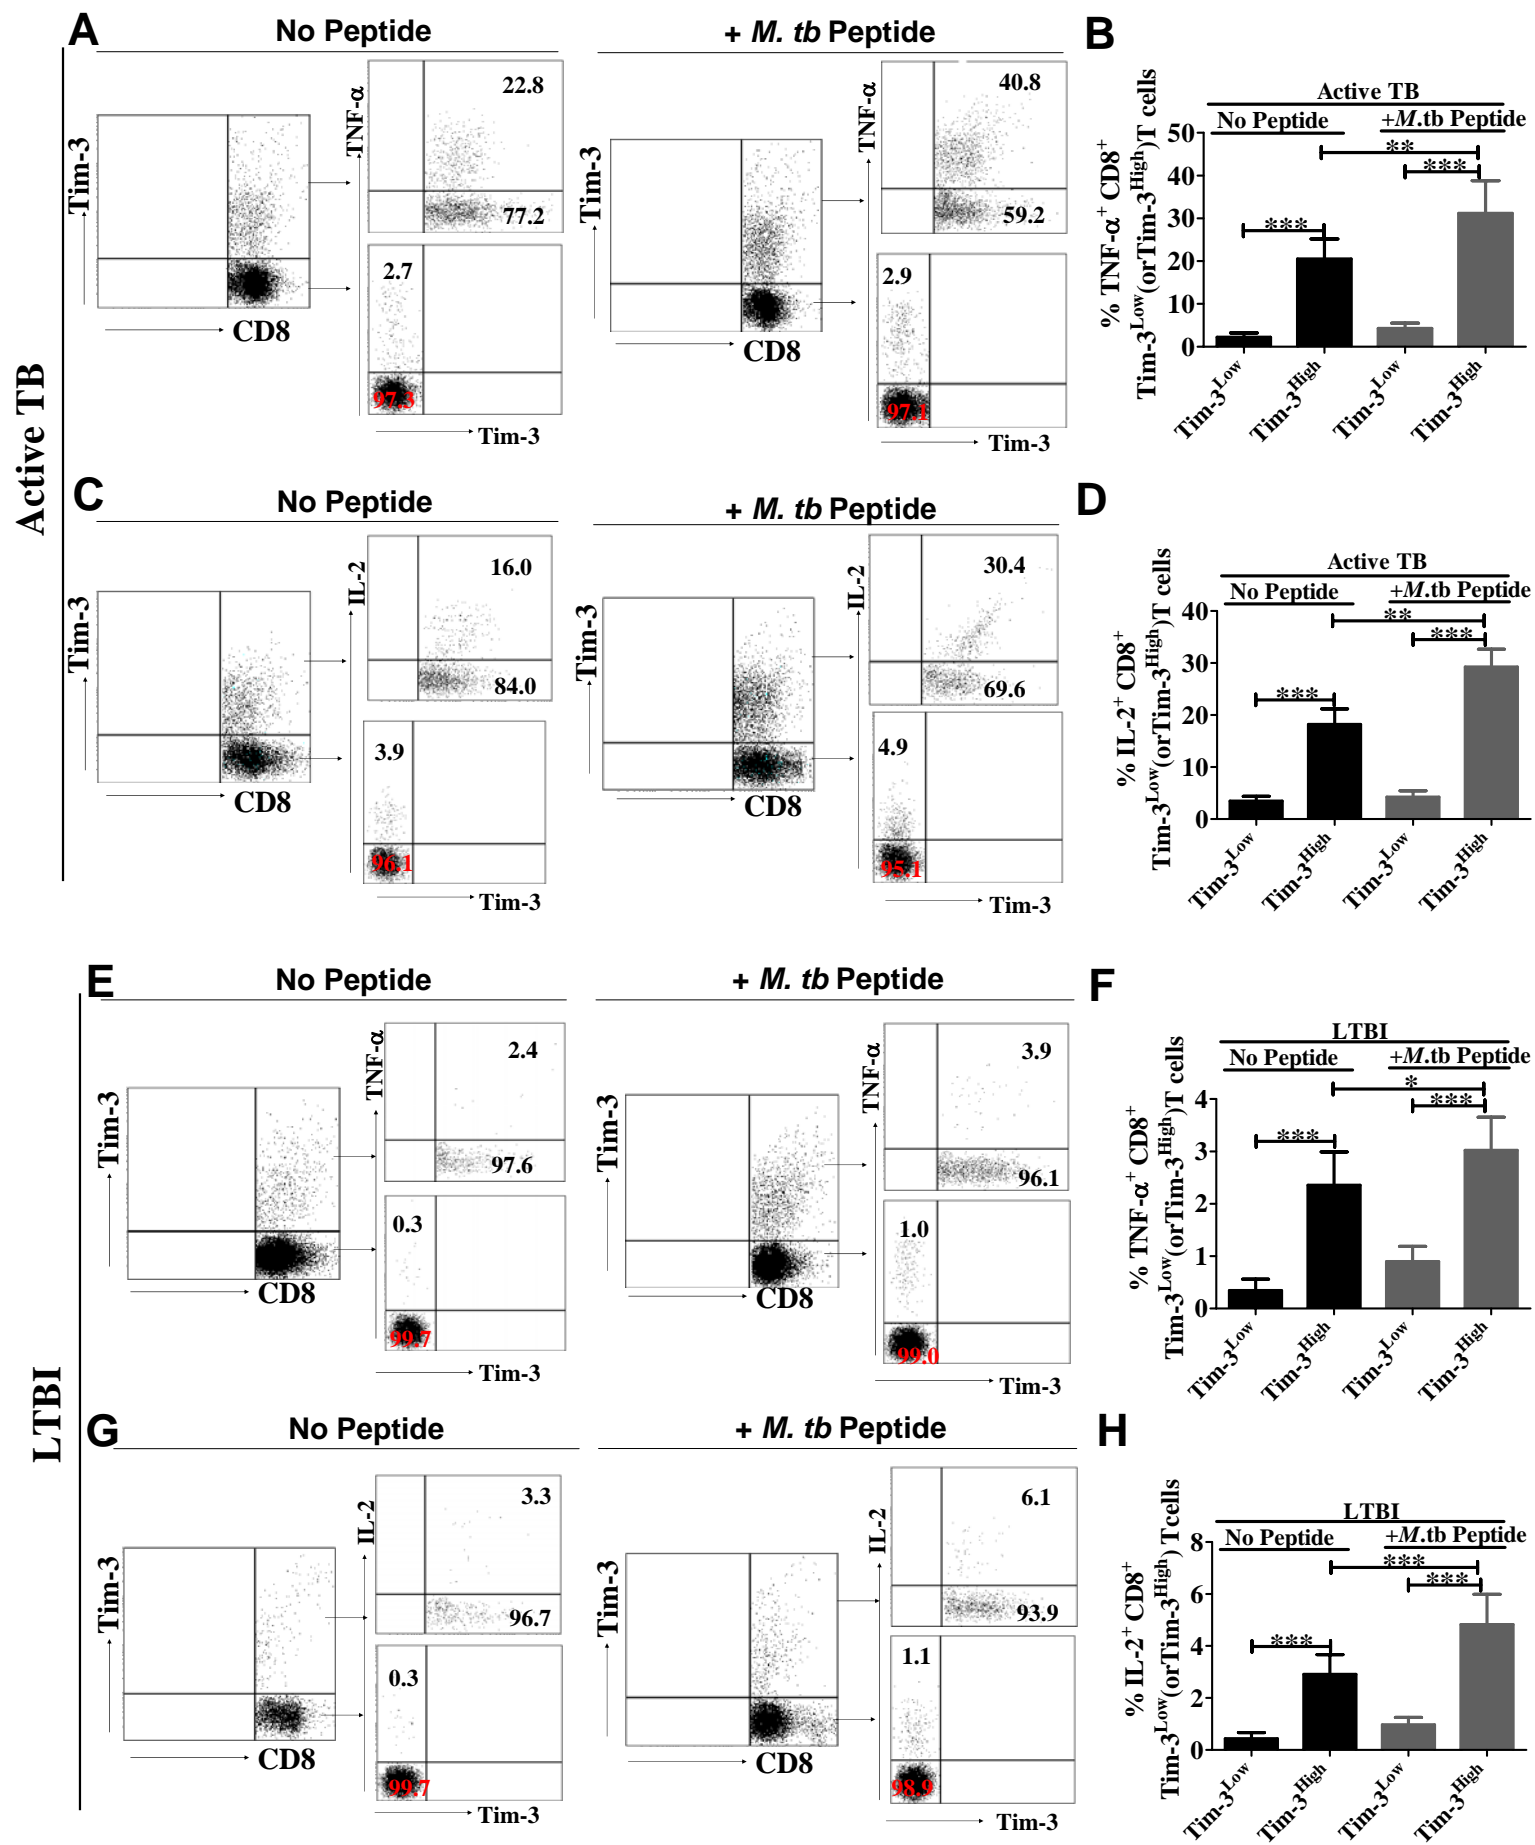

Supplement: ppat.1002984.s006.pdf [file ppat.1002984.s006.pdf]
