# Supplementary material for: Tim-3-Expressing CD4+ and CD8+ T Cells in Human Tuberculosis (TB) Exhibit Polarized Effector Memory Phenotypes and Stronger Anti-TB Effector Functions
Source: PubMed Central journal article supplement (PMC3493466; doi:10.1371/journal.ppat.1002984), 2012-11-08

**Figure S7****A****Active TB**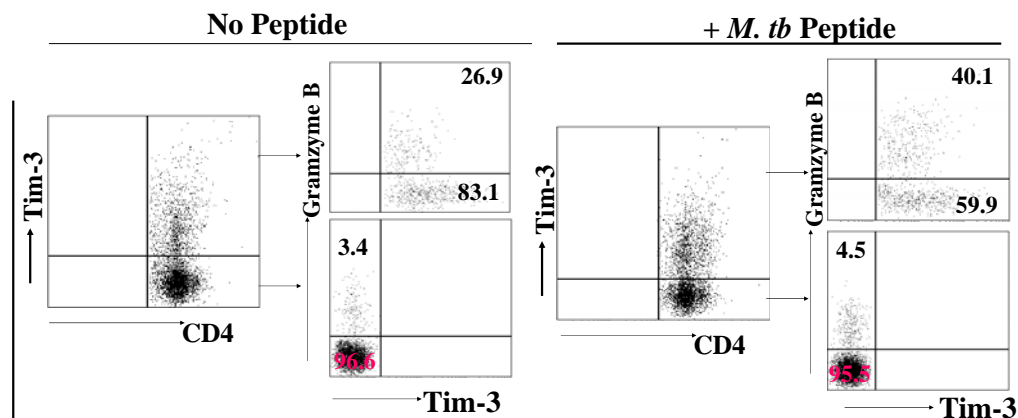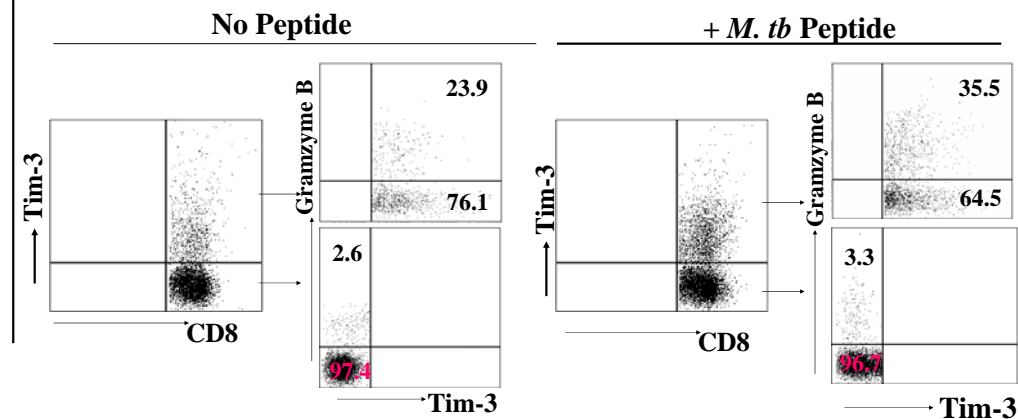**D****LTBI**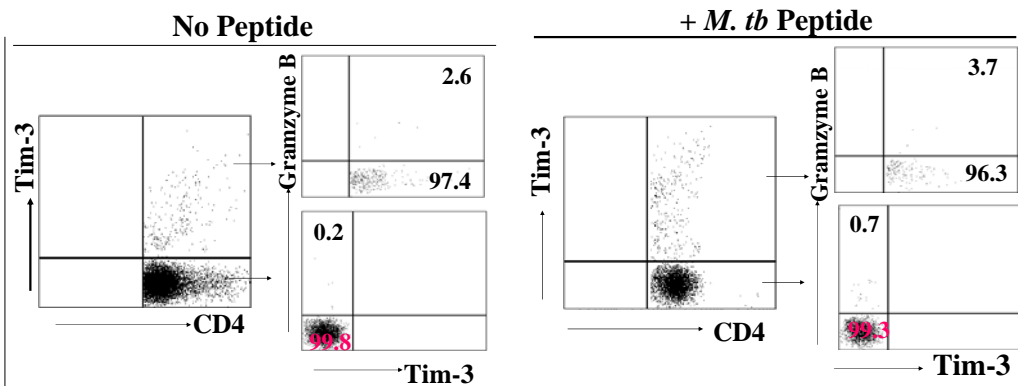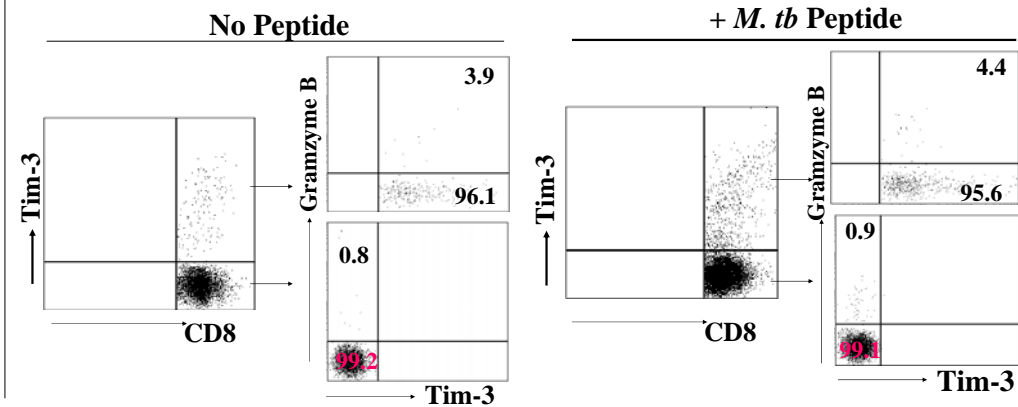**B**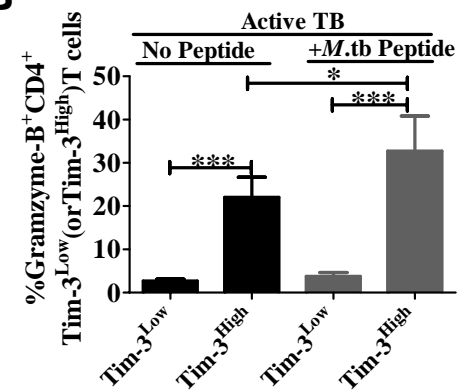**C**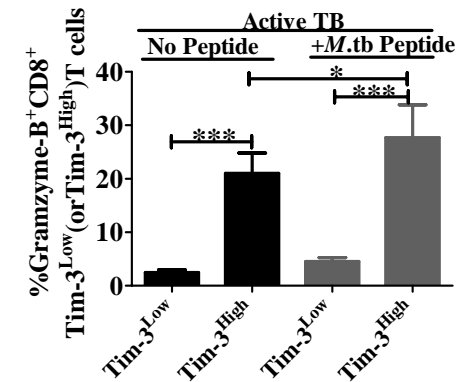**E**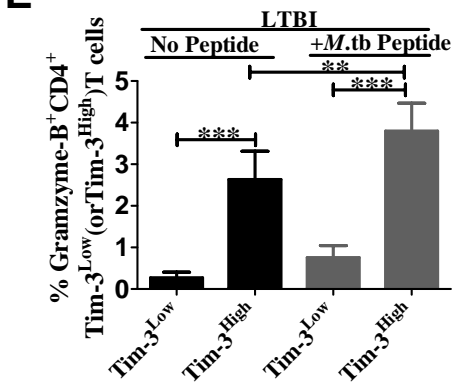**F**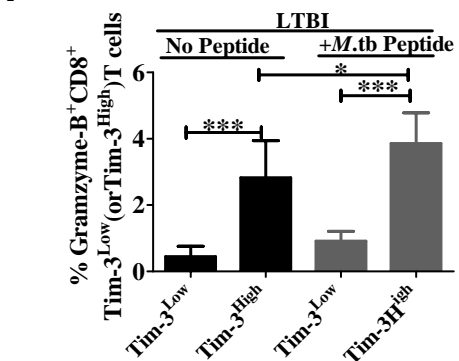

Supplement: ppat.1002984.s007.pdf [file ppat.1002984.s007.pdf]
