# Supplementary material for: Tim-3-Expressing CD4+ and CD8+ T Cells in Human Tuberculosis (TB) Exhibit Polarized Effector Memory Phenotypes and Stronger Anti-TB Effector Functions
Source: PubMed Central journal article supplement (PMC3493466; doi:10.1371/journal.ppat.1002984), 2012-11-08
Supplement: ppat.1002984.s010.pdf [file ppat.1002984.s010.pdf]

**Table S1**

| <b>Group</b>               | <b>HC</b> | <b>LTBI</b> | <b>Active TB</b> |
|----------------------------|-----------|-------------|------------------|
| <b>Cases</b>               | 9         | 30          | 30               |
| <b>Sex (Male)</b>          | 4 (45%)   | 17 (57%)    | 18 (60%)         |
| <b>Age (Years)</b>         | 31±1.8    | 35±2.4      | 34±1.5           |
| <b>BCG-vaccinated</b>      | 9 (100%)  | 30 (100%)   | 30 (100%)        |
| <b>HIV<sup>+</sup></b>     | 0         | 0           | 0                |
| <b>TST<sup>+</sup></b>     | 0         | 30 (100%)   | 30(100%)         |
| <b>AFB<sup>+</sup></b>     | 0         | 0           | 25(83.3%)        |
| <b>Culture<sup>+</sup></b> | 0         | 0           | 30(100%)         |
| <b>PCR<sup>+</sup></b>     | 0         | 0           | 30(100%)         |
| <b>Pulmonary TB</b>        | 0         | 0           | 30(100%)         |
